# Supplementary material
Source: Springer Nature journal article supplement (https://www.springermedizin.de/resource/supplementary/12960_2013_359_MOESM1_ESM.pdf/9569918)

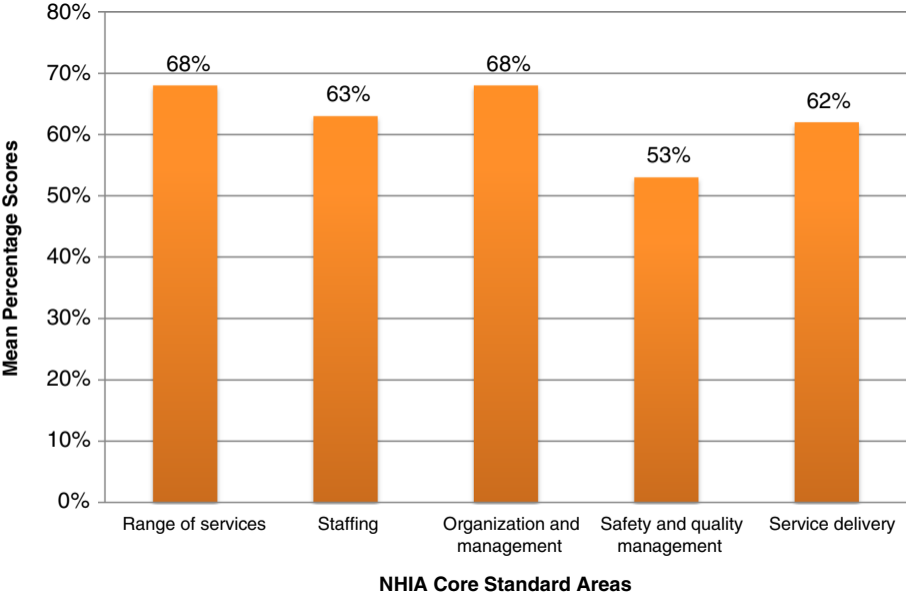

Supplement: MOESM1 [file 9569918]
